# Supplementary material for: The WAVE3/β-catenin oncogenic signaling regulates chemoresistance in triple negative breast cancer
Source: PubMed Central journal article supplement (PMC10035207; doi:10.1186/s13058-023-01634-3), 2023-03-22

Figure 4

Fig. 4C: WAVE3

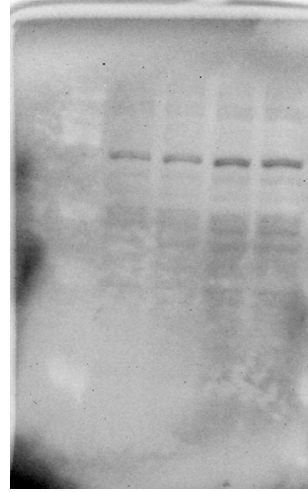

Fig. 4D: WAVE3

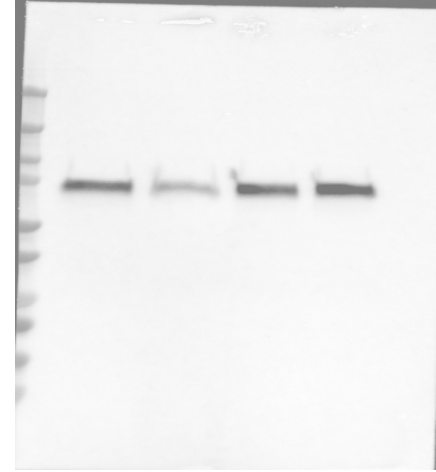

Fig. 4C:  $\beta$ -Actin

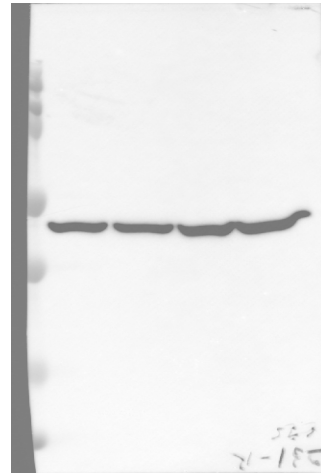

Fig. 4D:  $\beta$ -Actin

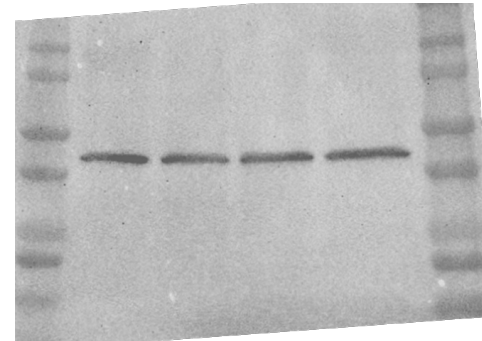

# Figure 5

Fig. 5A:  $\beta$ -Catenin

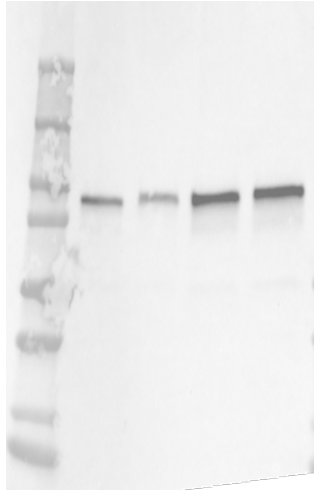

Fig. 5A:  $\beta$ -Actin

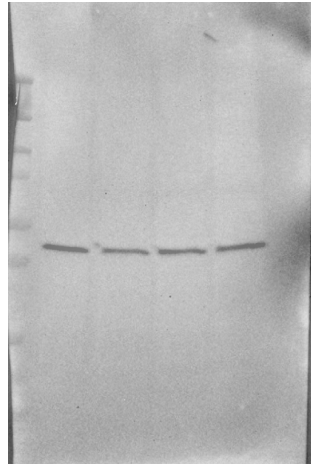

Fig. 5B:  $\beta$ -Catenin

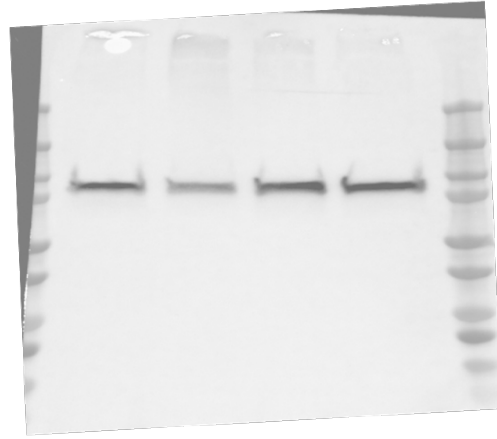

Fig. 5B:  $\beta$ -Actin

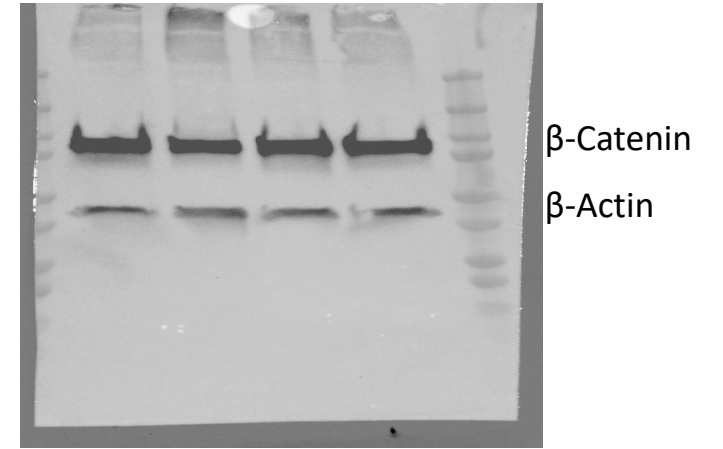

Fig. 5C:  $\beta$ -Catenin

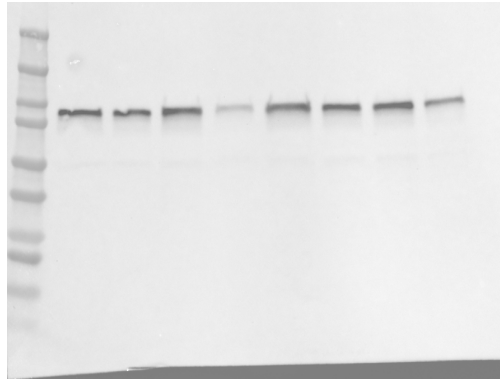

Fig. 5D:  $\beta$ -Catenin

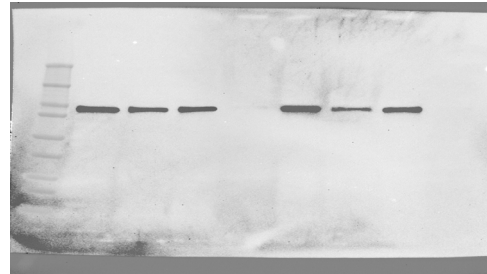

Fig. 5E:  $\beta$ -Catenin

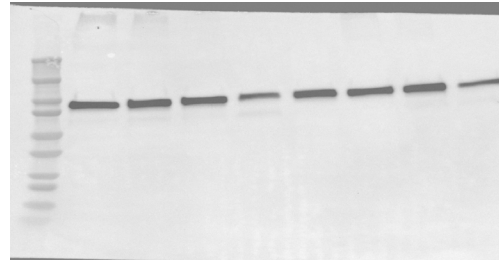

Fig. 5F:  $\beta$ -Catenin

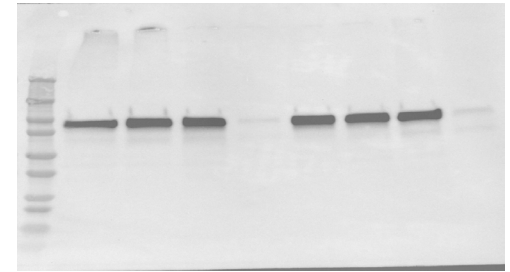

Fig. 5B:  $\beta$ -Actin

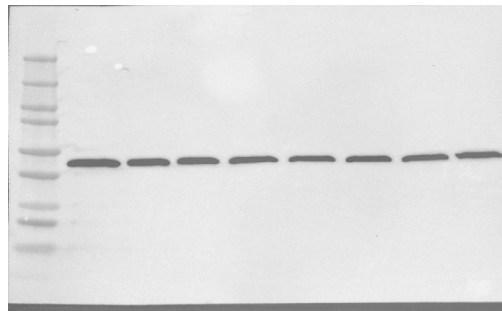

Fig. 5D:  $\beta$ -Actin

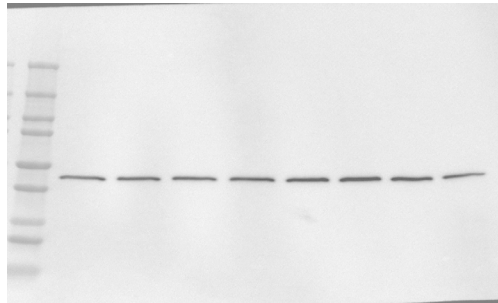

Fig. 5E:  $\beta$ -Actin

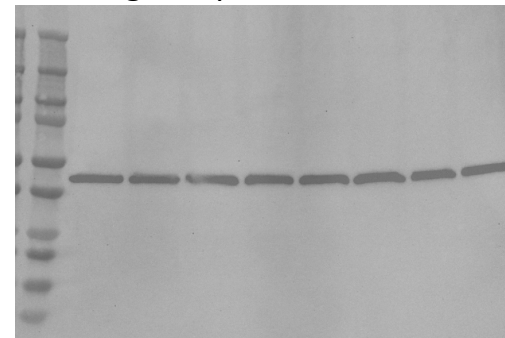

Fig. 5F:  $\beta$ -Actin

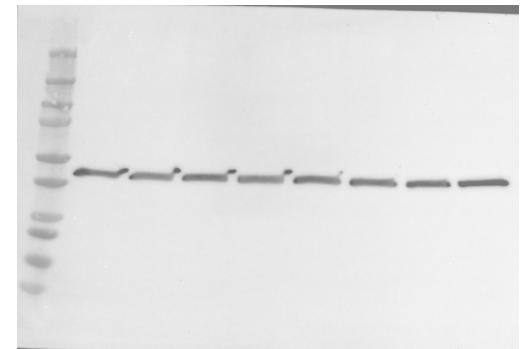

Figure 5, continued

Fig. 5H:  $\beta$ -Catenin

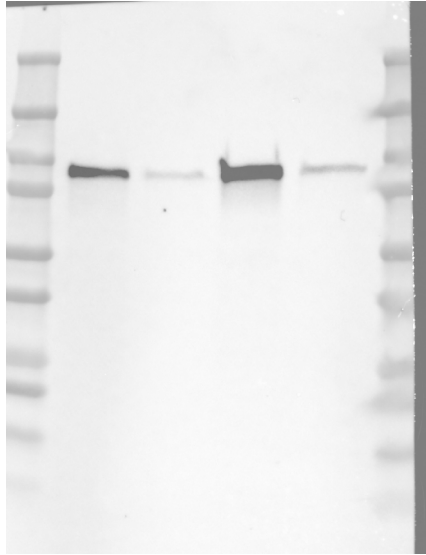

Fig. 5H: WAVE3

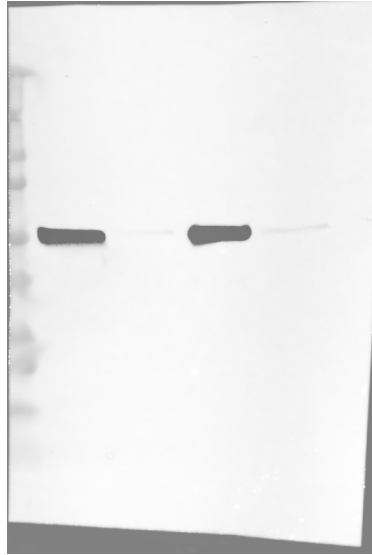

Fig. 5H:  $\alpha$ -Tubulin

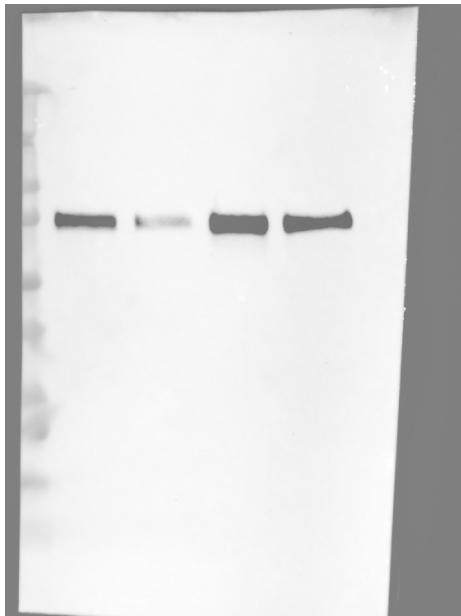

Fig. 5H: Lamin B1

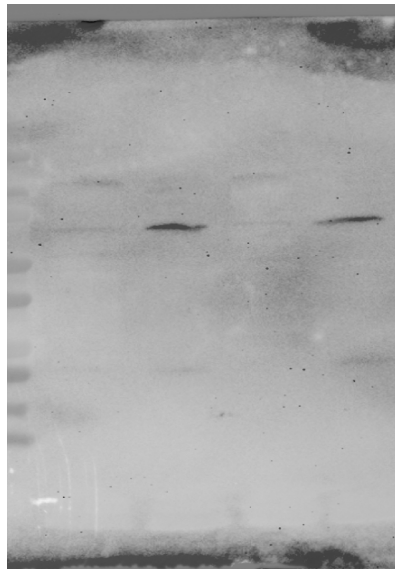

Fig. 5I:  $\beta$ -Catenin

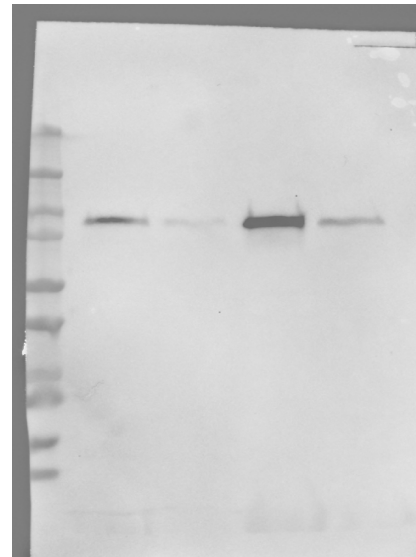

Fig. 5I: WAVE3

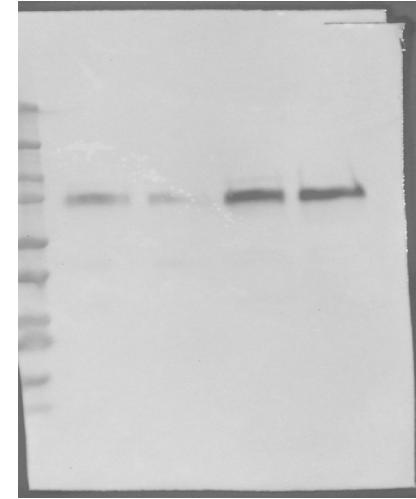

Fig. 5I:  $\alpha$ -Tubulin

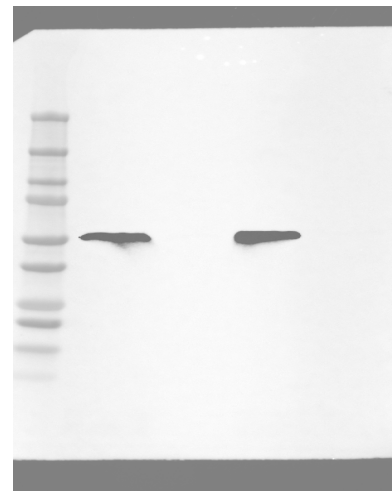

Fig. 5I: Lamin B1

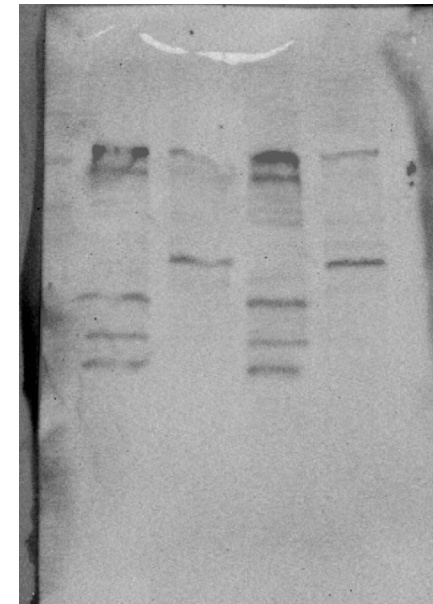

Figure 5, continued

Fig. 5J:  $\beta$ -Catenin

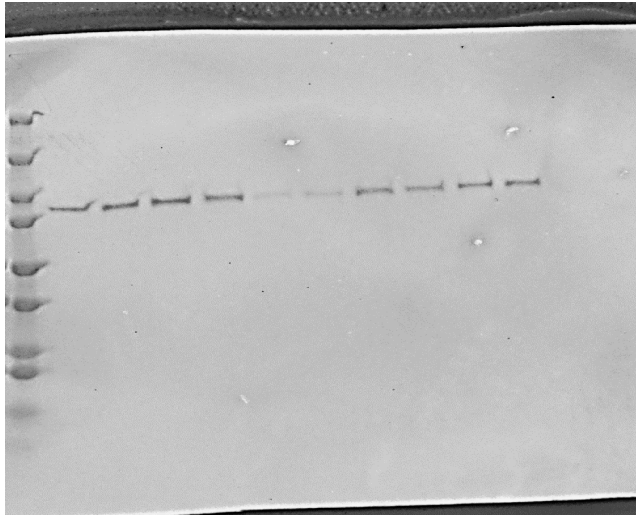

Fig. 5J: Lamin B1

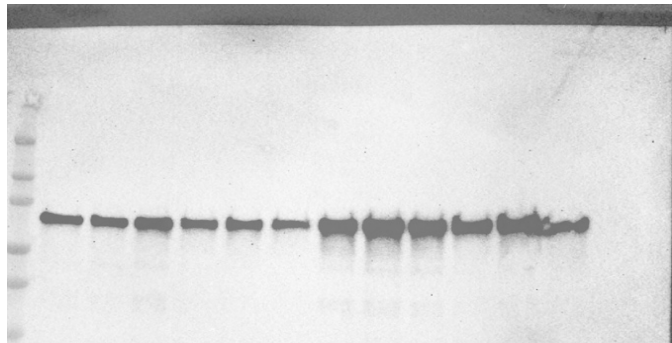

Fig. 5K:  $\beta$ -Catenin

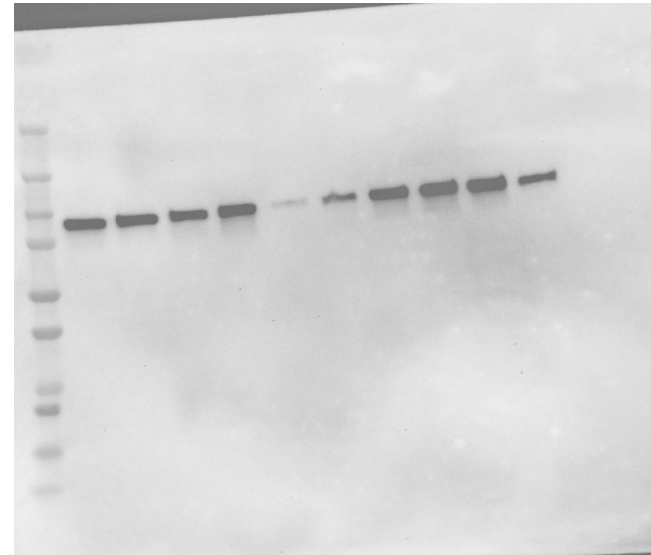

Fig. 5K:  $\alpha$ -Tubulin

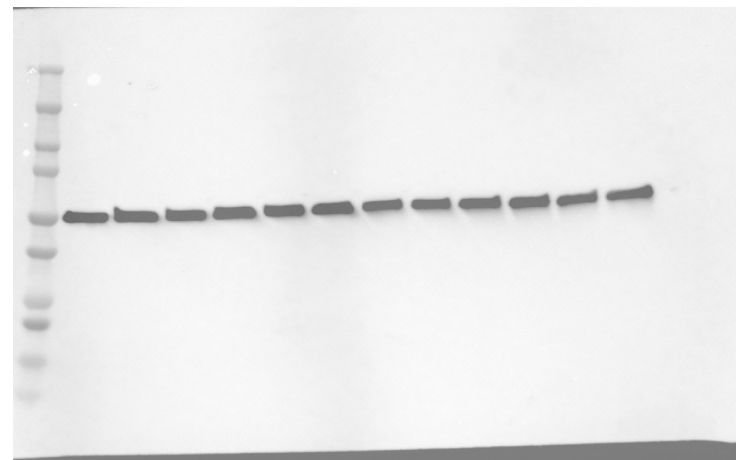

# Figure 6

Fig. 6A:  $\beta$ -Catenin

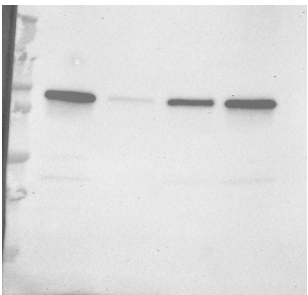

Fig. 6B:  $\beta$ -Catenin

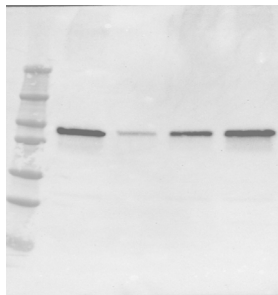

Fig. 6C:  $\beta$ -Catenin

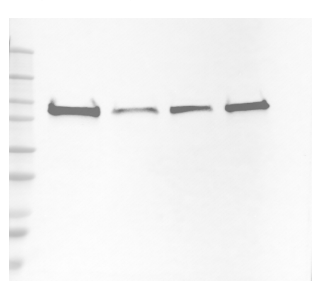

Fig. 6D:  $\beta$ -Catenin

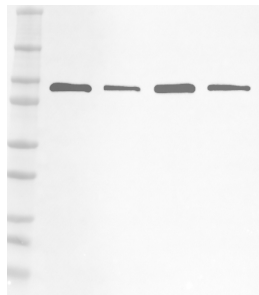

Fig. 6E:  $\beta$ -Catenin

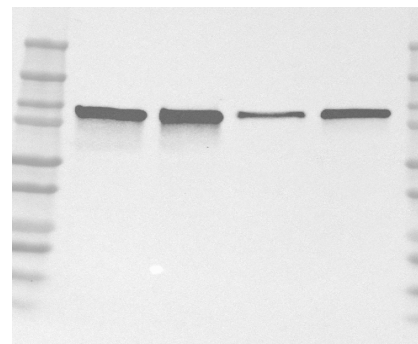

Fig. 6F:  $\beta$ -Catenin

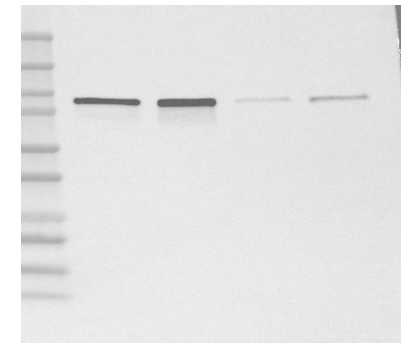

Fig. 6A:  $\beta$ -Actin

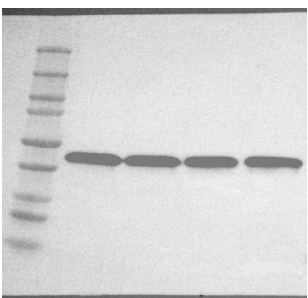

Fig. 6B:  $\beta$ -Actin

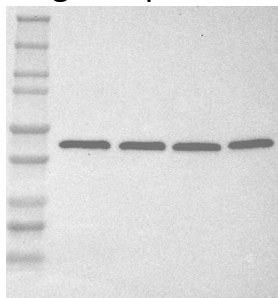

Fig. 6C:  $\beta$ -Actin

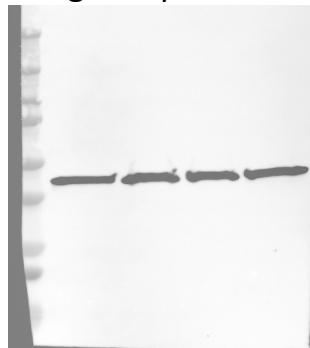

Fig. 6D:  $\beta$ -Actin

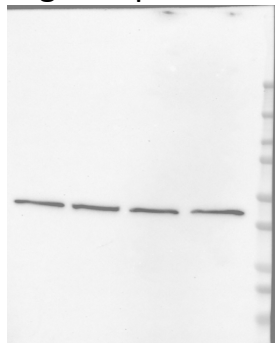

Fig. 6E: Lamin B1

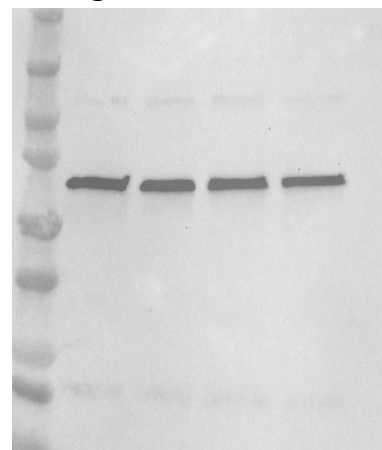

Fig. 6E:  $\alpha$ -Tubulin

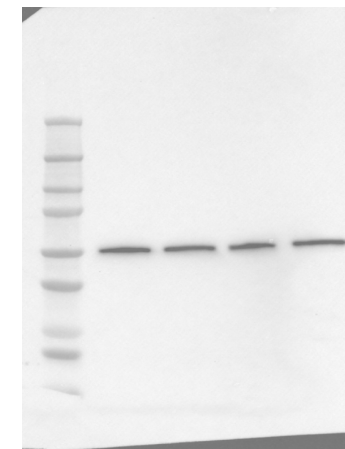

Figure 7

Fig. 7A: WAVE3

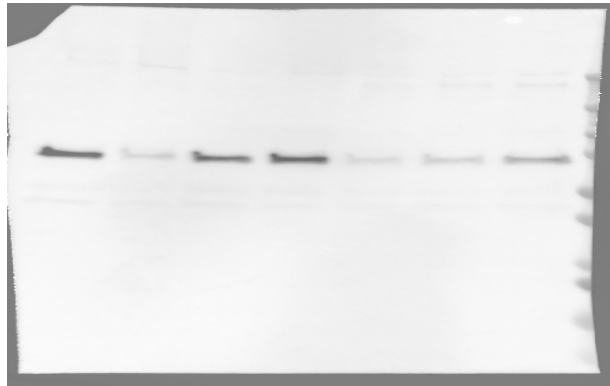

Fig. 7A:  $\beta$ -Catenin

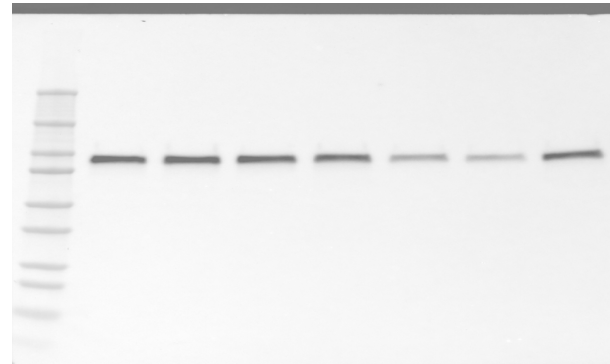

Fig. 7A:  $\beta$ -Actin

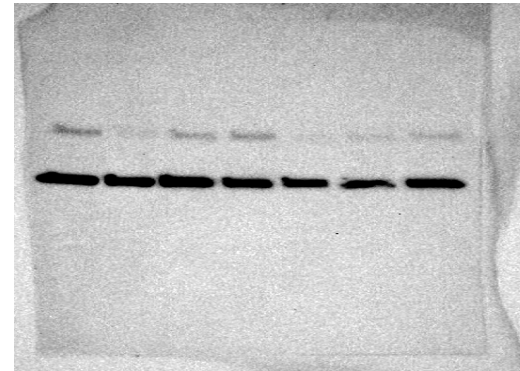

Figure S1

Fig. S1B: WAVE3

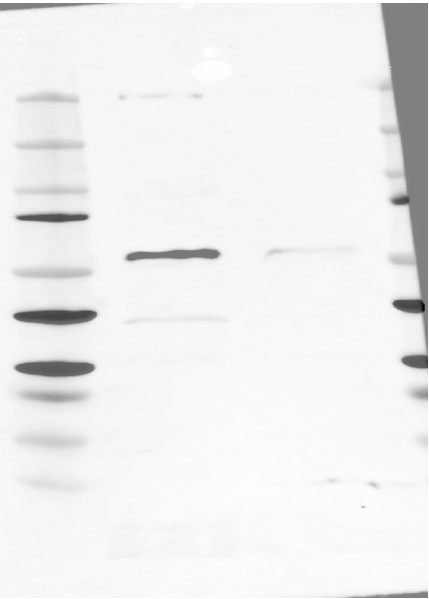

Fig. S1B:  $\beta$ -Actin

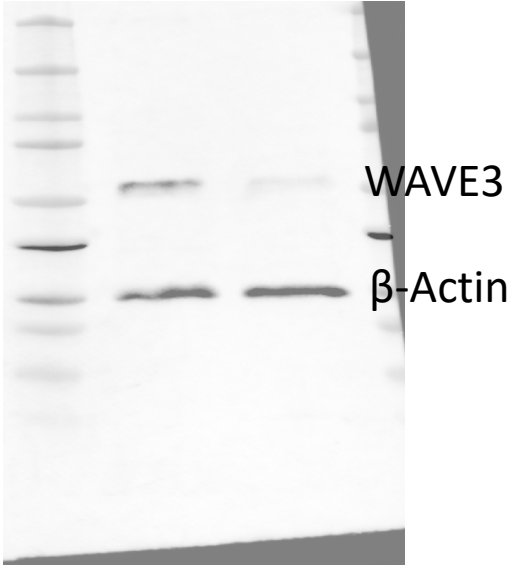

Fig. S1C: WAVE3

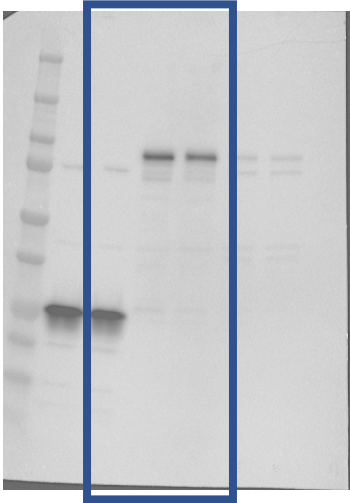

Fig. S1C:  $\beta$ -Actin

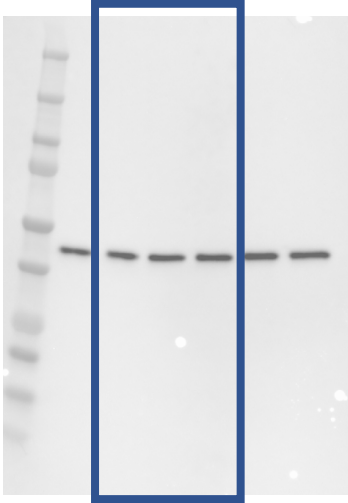

Supplement: 13058_2023_1634_MOESM2_ESM.pdf [file 13058_2023_1634_MOESM2_ESM.pdf]
