# Supplementary material for: The WAVE3/β-catenin oncogenic signaling regulates chemoresistance in triple negative breast cancer
Source: Springer Nature journal article supplement (doi:10.1186/s13058-023-01634-3), 2023-03-22
Supplement: MOESM1 [file 24662050]

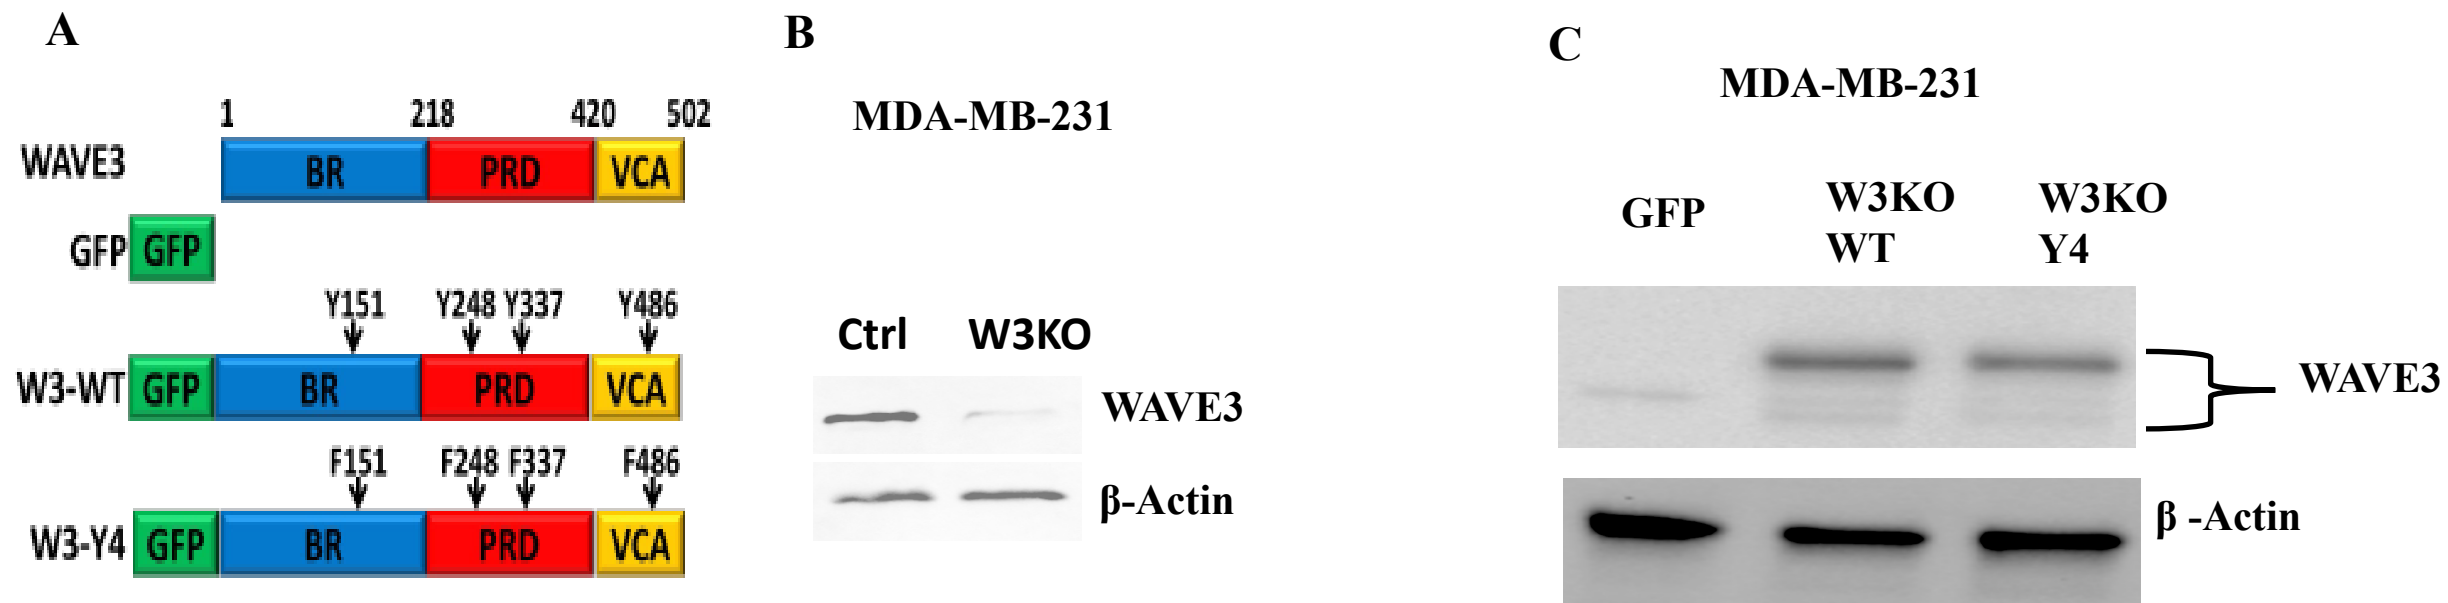

Figure S1



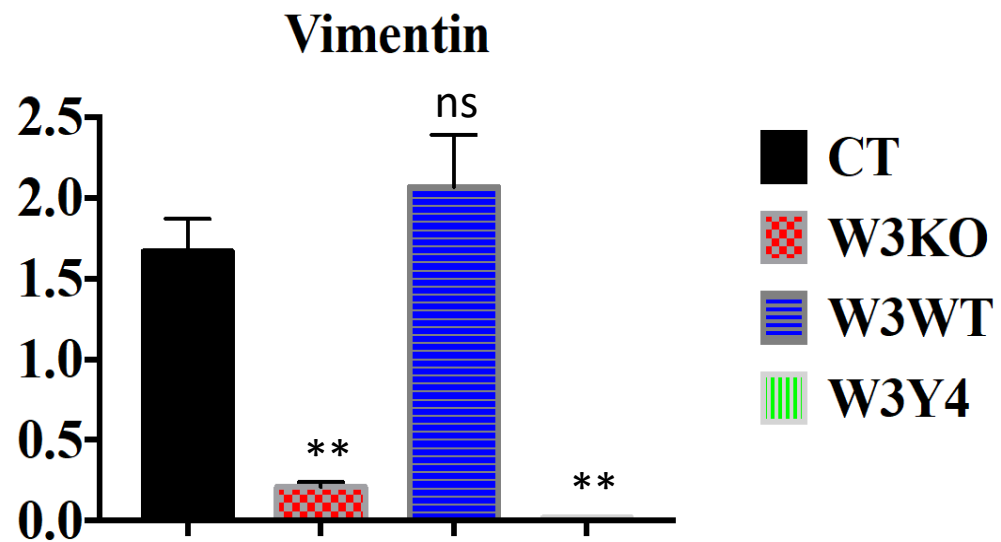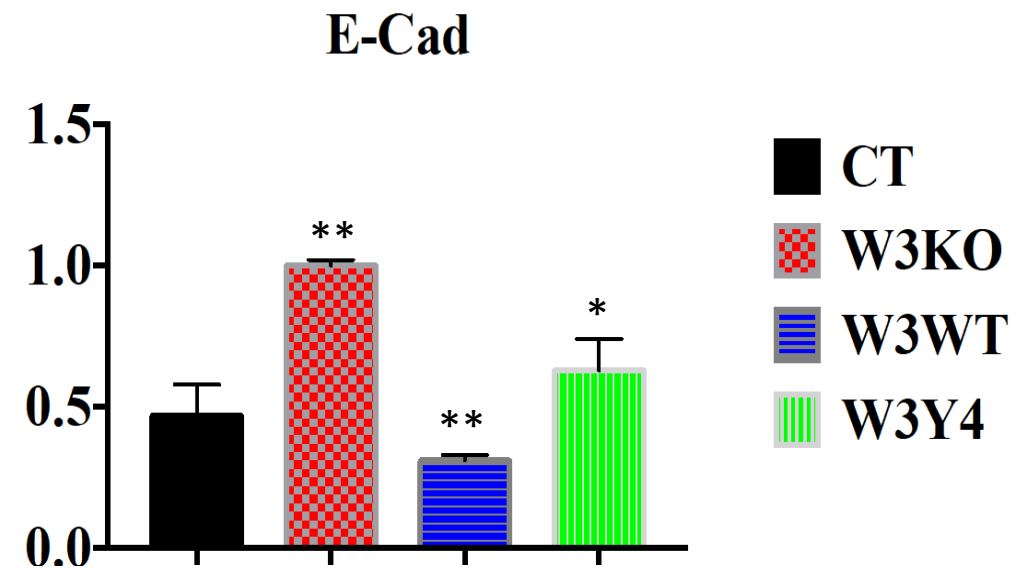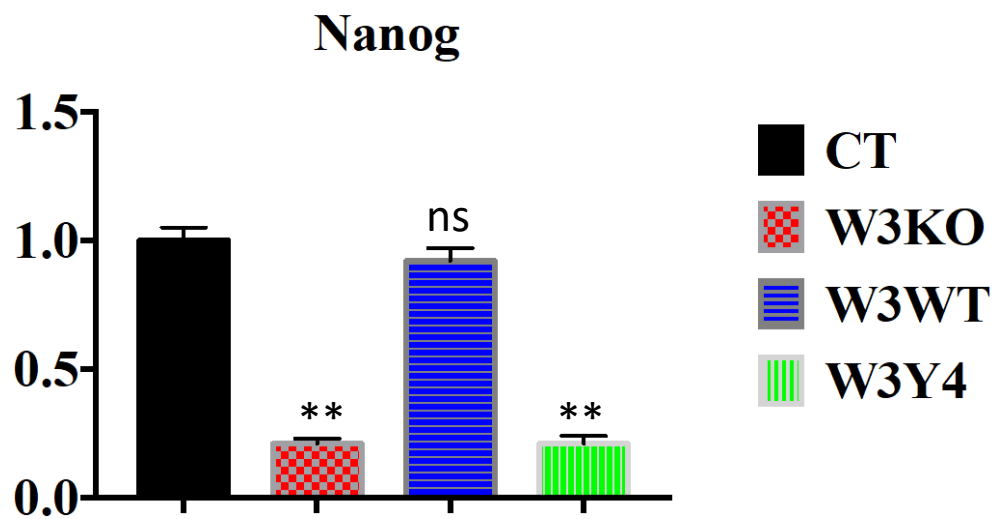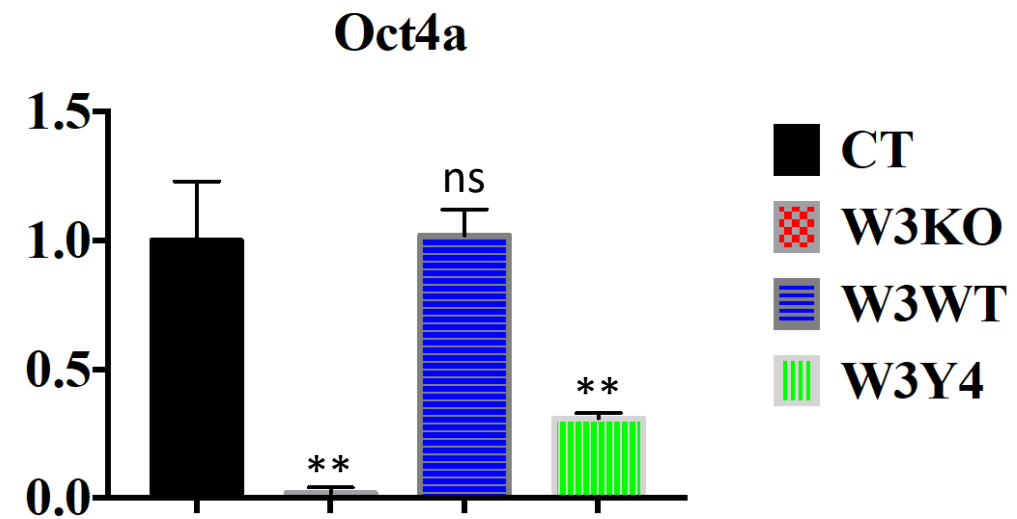

Figure S3
